# Supplementary material
Source: Research Square preprint supplement (doi:10.21203/rs.3.rs-9084283/v1)
Supplement: Supplementary file 1 [file bf8b0a56b8579b1d31428335.docx]

**Figure 5A**


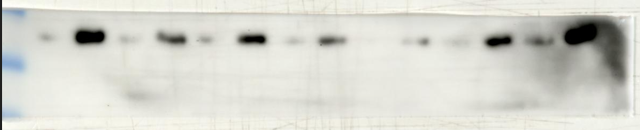
 **SH2D2A**

43kDa

124kDa


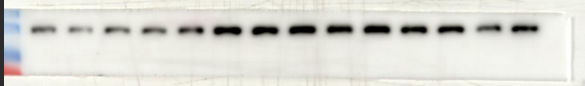
 **Vinculin**

**Figure5C**


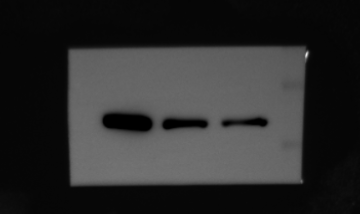
**DLD1 SH2D2A**
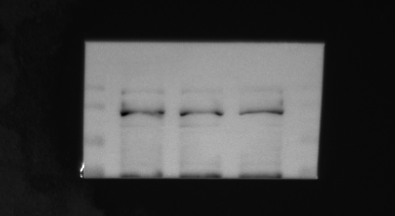
 **DLD1 Vinculin**

124kDa

43kDa


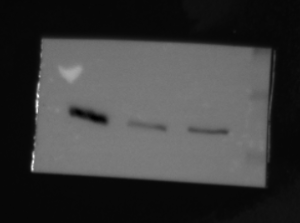
**HCT116 SH2D2A**
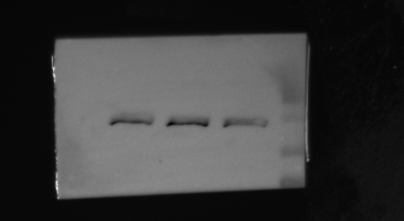
**HCT116 Vinculin**

124kDa

43kDa

**Figure5H**


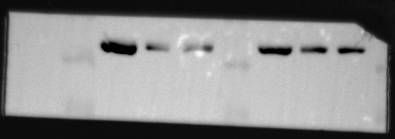
 **left DLD1 SH2D2A right HCT116 SH2D2A**

43kDa


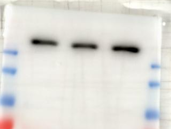
 **DLD1 mtor**
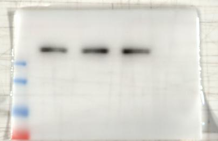
 **HCT116 mtor**

289 kDa

289 kDa

289 kDa

289 kDa


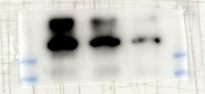
**DLD1 p-mtor**
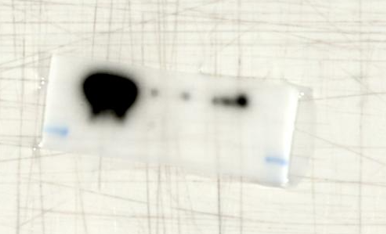
 **HCT116 p-mtor**

56 kDa

56 kDa


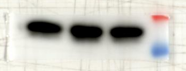
 **DLD1 AKT**
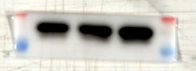
 **HCT116 AKT**

56 kDa

56 kDa


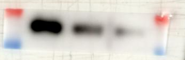
 **DLD1 AKT**
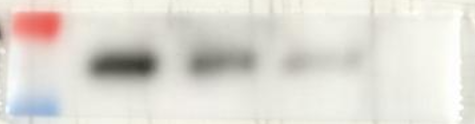
 **HCT116 p-AKT**


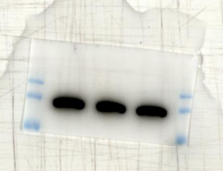
 **DLD1 Vinculin**
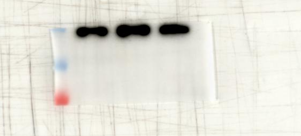
 **HCT116 Vinculin**

**Figure5J**


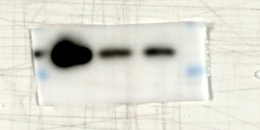
**DLD1 SH2D2A**
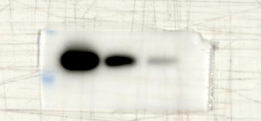
**HCT116 SH2D2A**

43 kDa

43 kDa


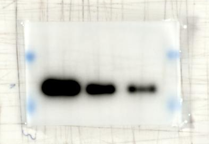
 **DLD1 VEGFA**
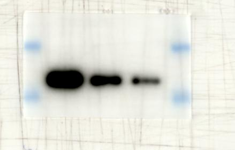
 **HCT116 VEGFA**

120 kDa

120 kDa

40 kDa

40 kDa


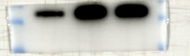
**DLD1 Ecad**
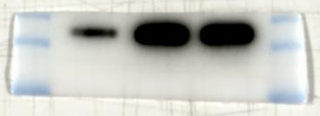
**HCT116 Ecad**

130 kDa

130 kDa


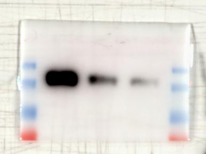
**DLD1 Ncad**
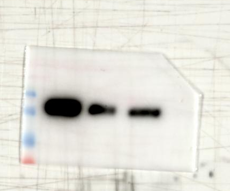
**HCT116 Ncad**

124 kDa

124 kDa


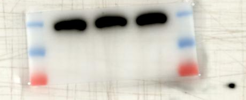
 **DLD1 Vinculin**
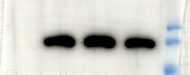
 **HCT16 Vincu 1lin**

**Figure6A**


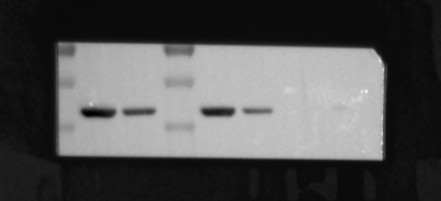
**SH2D2A left DLD1 right HCT116**

43 kDa


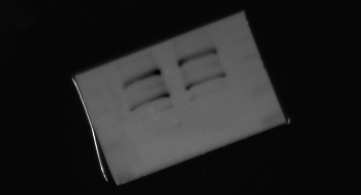
**DLD1 Vinculin**
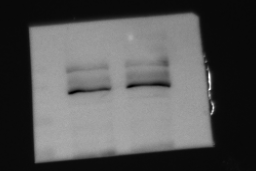
 **HCT116 Vinculin**

124 kDa

124 kDa

**Figure6E**


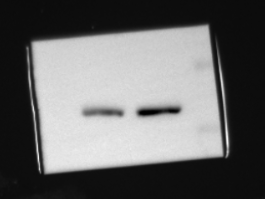
 **DLD1 SH2D2A**
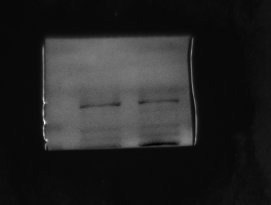
 **DLD1 Vinculin**

124 kDa

43 kDa


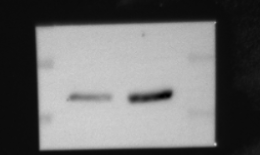
 **HCT116 SH2D2A**
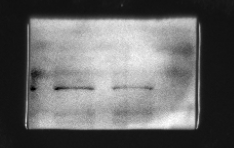
 **HCT116 Vinculin**

124 kDa

43 kDa
